# Supplementary material for: Factors Associated With Violence Against Children in Low- and Middle-Income Countries: A Systematic Review and Meta-Regression of Nationally Representative Data
Source: PubMed Central journal article supplement (PMC7961628; doi:10.1177/1524838020985532), 2021-01-19
Supplement: Appendix_A_clean.pdf [file Appendix_A_clean.pdf]

## Appendix A. Medline/PubMed search strategy

| <b>Search Number</b> | <b>Search</b>        | <b>Results</b> |
|----------------------|----------------------|----------------|
| <b>Children</b>      |                      |                |
| #1                   | child*.ab,ti.        | 1191902        |
| #2                   | minor*.ab,ti.        | 255050         |
| #3                   | schoolchild*.ab,ti.  | 12308          |
| #4                   | infan*.ab,ti.        | 385653         |
| #5                   | adolescen*.ab,ti.    | 224123         |
| #6                   | newborn*.ab,ti.      | 145148         |
| #7                   | preschool*.ab,ti.    | 23520          |
| #8                   | pre-school*.ab,ti.   | 4325           |
| #9                   | kindergarten*.ab,ti. | 5248           |
| #10                  | underage.ab,ti.      | 919            |
| #11                  | youth.ab,ti.         | 48564          |
| #12                  | youths.ab,ti.        | 9661           |
| #13                  | baby.ab,ti.          | 33012          |
| #14                  | babies.ab,ti.        | 32689          |
| #15                  | prepubescen*.ab,ti.  | 902            |
| #16                  | pubescen*.ab,ti.     | 1939           |
| #17                  | schoolage.ab,ti.     | 40             |
| #18                  | school-age.ab,ti.    | 11183          |
| #19                  | boy*.ab,ti.          | 134984         |
| #20                  | girl*.ab,ti.         | 129313         |

|            |                             |                |
|------------|-----------------------------|----------------|
| #21        | offspring.ab,ti.            | 59539          |
| #22        | pediatric*.ab,ti.           | 234505         |
| #23        | paediatric*.ab,ti.          | 51927          |
| #24        | juvenile*.ab,ti.            | 70452          |
| #25        | toddler*.ab,ti.             | 8427           |
| #26        | “nursery school*”.ab,ti.    | 1013           |
| #27        | “elementary school*”.ab,ti. | 8215           |
| #28        | “high school*”.ab,ti.       | 26030          |
| #29        | highschool*.ab,ti.          | 38             |
| #30        | “primary school*”.ab,ti.    | 10008          |
| #31        | “secondary school*”.ab,ti.  | 8411           |
| #32        | daycare.ab,ti.              | 1089           |
| #33        | teen.ab,ti.                 | 4542           |
| #34        | teens.ab,ti.                | 5401           |
| #35        | teenage*.ab,ti.             | 18506          |
| #36        | “child” [Mesh]              | 1909942        |
| #37        | “adolescent” [Mesh]         | 1860873        |
| #38        | “infant” [Mesh]             | 1099343        |
| <b>#39</b> | <b>or/1-38</b>              | <b>4031410</b> |

### **Factors**

|     |                       |         |
|-----|-----------------------|---------|
| #40 | risk*.ab,ti.          | 1774163 |
| #41 | “risk factor*”.ab,ti. | 471078  |

|     |                             |         |
|-----|-----------------------------|---------|
| #42 | “protective factor*”.ab,ti. | 13206   |
| #43 | “promotive factor*”.ab,ti.  | 87      |
| #44 | predict*.ab,ti.             | 1261638 |
| #45 | likelihood.ab,ti.           | 113760  |
| #46 | forecast*.ab,ti.            | 12844   |
| #47 | associat*.ab,ti.            | 3653981 |
| #48 | correlat*.ab,ti.            | 1578641 |
| #49 | covariate*.ab,ti.           | 46904   |
| #50 | covariance.ab,ti.           | 18904   |
| #51 | pathway*.ab,ti.             | 896367  |
| #52 | “risk factors” [Mesh]       | 870976  |
| #53 | “protective factors” [Mesh] | 8969    |
| #54 | <b>or/40-53</b>             | 7183780 |

## **Violence**

|     |                                     |       |
|-----|-------------------------------------|-------|
| #55 | (physical adj2 violen*).ab,ti.      | 2263  |
| #56 | (sexual adj2 violen*).ab,ti.        | 2996  |
| #57 | (emotional adj2 violen*).ab,ti.     | 261   |
| #58 | (psychological adj2 violen*).ab,ti. | 539   |
| #59 | (mental adj2 violen*).ab,ti.        | 449   |
| #60 | (physical adj2 abuse).ab,ti.        | 5027  |
| #61 | (sexual adj2 abuse).ab,ti.          | 11134 |
| #62 | (emotional adj2 abuse).ab,ti.       | 1660  |

|     |                                   |      |
|-----|-----------------------------------|------|
| #63 | (mental adj2 abuse).ab,ti.        | 1104 |
| #64 | (psychological adj2 abuse).ab,ti. | 766  |
| #65 | (verbal adj2 abuse).ab,ti.        | 718  |
| #66 | “child abuse”.ab,ti.              | 7672 |
| #67 | (physical adj2 assault*).ab,ti.   | 906  |
| #68 | (sexual adj2 assault*).ab,ti.     | 3936 |
| #69 | “physical attack*”.ab,ti.         | 141  |
| #70 | (severe adj2 punishment).ab,ti.   | 81   |
| #71 | (harsh adj2 punishment).ab,ti.    | 85   |
| #72 | “corporal punishment”.ab,ti.      | 428  |
| #73 | “corporeal punishment”.ab,ti.     | 4    |
| #74 | (severe adj2 discipline).ab,ti.   | 11   |
| #75 | (harsh adj2 discipline).ab,ti.    | 154  |
| #76 | “harsh parenting”.ab,ti.          | 223  |
| #77 | harass*.ab,ti.                    | 2828 |
| #78 | incest.ab,ti.                     | 1266 |
| #79 | maltreat*.ab,ti.                  | 5614 |
| #80 | “sexual violation*”.ab,ti.        | 36   |
| #81 | “forced sex”.ab,ti.               | 302  |
| #82 | “coerced sex”.ab,ti.              | 37   |
| #83 | rape.ab,ti.                       | 6412 |
| #84 | mistreat*.ab,ti.                  | 1452 |
| #85 | molest*.ab,ti.                    | 1134 |

|     |                                                |       |
|-----|------------------------------------------------|-------|
| #86 | defile*.ab,ti.                                 | 57    |
| #87 | (adverse adj childhood adj experience*).ab,ti. | 794   |
| #88 | “ACE”.ab,ti.                                   | 30565 |
| #89 | “violence against children”.ab,ti.             | 255   |
| #90 | “rape” [Mesh]                                  | 9787  |
| #91 | “child abuse” [Mesh]                           | 30306 |
| #92 | <b>or/55-91</b>                                | 88996 |

**Lower and middle-  
income countries**

|      |                            |       |
|------|----------------------------|-------|
| #93  | africa.ti,ab.              | 88138 |
| #94  | asia.ti,ab.                | 46392 |
| #95  | "west indies".ti,ab.       | 2179  |
| #96  | caribbean.ti,ab.           | 11373 |
| #97  | "south america".ti,ab.     | 11415 |
| #98  | "latin america".ti,ab.     | 11124 |
| #99  | "central america".ti,ab.   | 3211  |
| #100 | “middle east”.ti,ab.       | 8237  |
| #101 | “eastern Europe”.ti,ab.    | 4441  |
| #102 | “western pacific”.ti,ab.   | 1666  |
| #103 | (asia adj2 pacific).ti,ab. | 3000  |
| #104 | “pacific island*”.ti,ab.   | 4590  |
| #105 | “polynesia”.ti,ab.         | 1092  |

|      |                                  |        |
|------|----------------------------------|--------|
| #106 | “south pacific”,ti,ab.           | 1226   |
| #107 | “south sea island*”.ti,ab.       | 11     |
| #108 | oceana.ti,ab.                    | 21     |
| #109 | “eastern mediterranean”.ti,ab.   | 1722   |
| #110 | Afghanistan.ti,ab.               | 4705   |
| #111 | Guinea.ti,ab.                    | 103108 |
| #112 | Rwanda.ti,ab.                    | 2128   |
| #113 | Benin.ti,ab.                     | 2765   |
| #114 | Guinea-Bissau.ti,ab.             | 846    |
| #115 | Senegal.ti,ab.                   | 4864   |
| #116 | “Burkina Faso”.ti,ab.            | 3124   |
| #117 | Haiti.ti,ab.                     | 2522   |
| #118 | “Sierra Leone”.ti,ab.            | 1714   |
| #119 | Burundi.ti,ab.                   | 674    |
| #120 | Korea.ti,ab.                     | 33644  |
| #121 | Somalia.ti,ab.                   | 1134   |
| #122 | "Central Africa Republic".ti,ab. | 11     |
| #123 | Liberia.ti,ab.                   | 1259   |
| #124 | "South Sudan".ti,ab.             | 349    |
| #125 | Chad.ti,ab.                      | 952    |
| #126 | Madagascar.ti,ab.                | 3927   |
| #127 | Tanzania.ti,ab.                  | 9963   |
| #128 | Comoros.ti,ab.                   | 265    |

|      |                          |       |
|------|--------------------------|-------|
| #129 | Malawi.ti,ab.            | 5175  |
| #130 | Togo.ti,ab.              | 1196  |
| #131 | Congo.ti,ab.             | 9546  |
| #132 | Mali.ti,ab.              | 2836  |
| #133 | Uganda.ti,ab.            | 10905 |
| #134 | Eritrea.ti,ab.           | 410   |
| #135 | Mozambique.ti,ab.        | 2674  |
| #136 | Zimbabwe.ti,ab.          | 4585  |
| #137 | Ethiopia.ti,ab.          | 10159 |
| #138 | Nepal.ti,ab.             | 7253  |
| #139 | Gambia.ti,ab.            | 2040  |
| #140 | Niger.ti,ab.             | 10588 |
| #141 | Armenia.ti,ab.           | 822   |
| #142 | Kiribati.ti,ab.          | 145   |
| #143 | “Solomon Islands”.ti,ab. | 676   |
| #144 | Bangladesh.ti,ab.        | 10272 |
| #145 | Kosovo.ti,ab.            | 764   |
| #146 | “Sri Lanka”.ti,ab.       | 5013  |
| #147 | Bhutan.ti,ab.            | 494   |
| #148 | "Kyrgyz Republic".ti,ab. | 46    |
| #149 | Kyrgyzstan.ti,ab.        | 406   |
| #150 | Sudan.ti,ab.             | 6741  |
| #151 | Bolivia.ti,ab.           | 2675  |

|      |                               |      |
|------|-------------------------------|------|
| #152 | "Lao PDR".ti,ab.              | 635  |
| #153 | Laos.ti,ab.                   | 1433 |
| #154 | Swaziland.ti,ab.              | 696  |
| #155 | “Cabo Verde”.ti,ab.           | 58   |
| #156 | "Cape Verde".ti,ab.           | 439  |
| #157 | Lesotho.ti,ab.                | 545  |
| #158 | "Syrian Arab Republic".ti,ab. | 68   |
| #159 | Syria.ti,ab.                  | 1372 |
| #160 | Cambodia.ti,ab.               | 2981 |
| #161 | Mauritania.ti,ab.             | 509  |
| #162 | Tajikistan.ti,ab.             | 438  |
| #163 | Cameroon.ti,ab.               | 5462 |
| #164 | Micronesia.ti,ab.             | 566  |
| #165 | Timor-Leste.ti,ab.            | 230  |
| #166 | Moldova.ti,ab.                | 388  |
| #167 | Tonga.ti,ab.                  | 382  |
| #168 | “cote d’ivoire”.ti,ab.        | 1780 |
| #169 | "Ivory Coast".ti,ab.          | 1589 |
| #170 | Mongolia.ti,ab.               | 3011 |
| #171 | Tunisia.ti,ab.                | 5371 |
| #172 | Djibouti.ti,ab.               | 316  |
| #173 | Morocco.ti,ab.                | 4411 |
| #174 | Ukraine.ti,ab.                | 3752 |



|      |                           |       |
|------|---------------------------|-------|
| #175 | Egypt.ti,ab.              | 11296 |
| #176 | Myanmar.ti,ab.            | 2149  |
| #177 | Uzbekistan.ti,ab.         | 977   |
| #178 | "El Salvador".ti,ab.      | 1061  |
| #179 | Nicaragua.ti,ab.          | 1552  |
| #180 | Vanuatu.ti,ab.            | 542   |
| #181 | Ghana.ti,ab.              | 7424  |
| #182 | Nigeria.ti,ab.            | 22938 |
| #183 | Vietnam.ti,ab.            | 11167 |
| #184 | Guatemala.ti,ab.          | 2867  |
| #185 | Pakistan.ti,ab.           | 13276 |
| #186 | "West Bank".ti,ab.        | 513   |
| #187 | Gaza.ti,ab.               | 799   |
| #188 | Honduras.ti,ab.           | 1407  |
| #189 | "Papua New Guinea".ti,ab. | 4038  |
| #190 | Yemen.ti,ab.              | 1509  |
| #191 | India.ti,ab.              | 78332 |
| #192 | Philippines.ti,ab.        | 6722  |
| #193 | Zambia.ti,ab.             | 4095  |
| #194 | Indonesia.ti,ab.          | 8947  |
| #195 | Samoa.ti,ab.              | 754   |
| #196 | Kenya.ti,ab.              | 14162 |
| #197 | "Sao Tome".ti,ab.         | 213   |

|      |                   |       |
|------|-------------------|-------|
| #198 | Principe.ti,ab.   | 260   |
| #199 | Albania.ti,ab.    | 855   |
| #200 | Ecuador.ti,ab.    | 3355  |
| #201 | Montenegro.ti,ab. | 669   |
| #202 | Algeria.ti,ab.    | 2533  |
| #203 | Fiji.ti,ab.       | 1324  |
| #204 | Namibia.ti,ab.    | 1164  |
| #205 | Gabon.ti,ab.      | 1495  |
| #206 | Palau.ti,ab.      | 313   |
| #207 | Angola.ti,ab.     | 1118  |
| #208 | Georgia.ti,ab.    | 8173  |
| #209 | Panama.ti,ab.     | 3412  |
| #210 | Argentina.ti,ab.  | 13254 |
| #211 | Grenada.ti,ab.    | 256   |
| #212 | Paraguay.ti,ab.   | 1178  |
| #213 | Azerbaijan.ti,ab. | 1083  |
| #214 | Guyana.ti,ab.     | 809   |
| #215 | Peru.ti,ab.       | 8140  |
| #216 | Belarus.ti,ab.    | 1090  |
| #217 | Iran.ti,ab.       | 27117 |
| #218 | Romania.ti,ab.    | 4337  |
| #219 | Belize.ti,ab.     | 669   |
| #220 | Iraq.ti,ab.       | 5485  |

|      |                             |        |
|------|-----------------------------|--------|
| #221 | "Russian Federation".ti,ab. | 2928   |
| #222 | Russia.ti,ab.               | 12993  |
| #223 | Bosnia.ti,ab.               | 1926   |
| #224 | Herzegovina.ti,ab.          | 1441   |
| #225 | Jamaica.ti,ab.              | 2913   |
| #226 | Serbia.ti,ab.               | 3405   |
| #227 | Botswana.ti,ab.             | 1827   |
| #228 | Jordan.ti,ab.               | 4616   |
| #229 | "South Africa".ti,ab.       | 25899  |
| #230 | Brazil.ti,ab.               | 65419  |
| #231 | Kazakhstan.ti,ab.           | 1666   |
| #232 | "St. Lucia".ti,ab.          | 257    |
| #233 | "Saint Lucia".ti,ab.        | 59     |
| #234 | Bulgaria.ti,ab.             | 3591   |
| #235 | Lebanon.ti,ab.              | 3352   |
| #236 | "St. Vincent".ti,ab.        | 386    |
| #237 | "Saint Vincent".ti,ab.      | 167    |
| #238 | Grenadines.ti,ab.           | 57     |
| #239 | China.ti,ab.                | 121025 |
| #240 | Libya.ti,ab.                | 1063   |
| #241 | Suriname.ti,ab.             | 441    |
| #242 | Colombia.ti,ab.             | 9130   |
| #243 | Macedonia.ti,ab.            | 943    |

|      |                             |          |
|------|-----------------------------|----------|
| #244 | Thailand.ti,ab.             | 21830    |
| #245 | "Costa Rica".ti,ab.         | 4048     |
| #246 | Malaysia.ti,ab.             | 12041    |
| #247 | Turkey.ti,ab.               | 29359    |
| #248 | Cuba.ti,ab.                 | 3914     |
| #249 | Maldives.ti,ab.             | 231      |
| #250 | Turkmenistan.ti,ab.         | 276      |
| #251 | Dominica.ti,ab.             | 380      |
| #252 | "Marshall Islands".ti,ab.   | 260      |
| #253 | Tuvalu.ti,ab.               | 51       |
| #254 | "Dominican Republic".ti,ab. | 1530 808 |
| #255 | Mauritius.ti,ab.            | 808      |
| #256 | Venezuela.ti,ab.            | 4636     |
| #257 | "Equatorial Guinea".ti,ab.  | 346      |
| #258 | Mexico.ti,ab.               | 34201    |
| #259 | Cameroon.ti,ab.             | 5462     |
| #260 | Hungary.ti,ab.              | 8995     |
| #261 | Seychelles.ti,ab.           | 587      |
| #262 | Uruguay.ti,ab.              | 2223     |
| #263 | "Saint Kitts".ti,ab.        | 18       |
| #264 | "St. Kitts".ti,ab.          | 150      |
| #265 | Nevis.ti,ab.                | 91       |
| #266 | Poland.ti,ab.               | 19583    |

|      |                                   |       |
|------|-----------------------------------|-------|
| #267 | Lithuania.ti,ab.                  | 2079  |
| #268 | Latvia.ti,ab.                     | 1052  |
| #269 | Croatia.ti,ab.                    | 5264  |
| #270 | Chile.ti,ab.                      | 10628 |
| #271 | Antigua.ti,ab.                    | 198   |
| #272 | Barbuda.ti,ab.                    | 53    |
| #273 | Aruba.ti,ab.                      | 149   |
| #274 | Bahrain.ti,ab.                    | 722   |
| #275 | Barbados.ti,ab.                   | 863   |
| #276 | "Czech Republic".ti,ab.           | 6554  |
| #277 | Czechoslovakia.ti,ab.             | 3116  |
| #278 | Estonia.ti,ab.                    | 2121  |
| #279 | Gibraltar.ti,ab.                  | 285   |
| #280 | Greece.ti,ab.                     | 12104 |
| #281 | Guam.ti,ab.                       | 1049  |
| #282 | "Isle of Man".ti,ab.              | 118   |
| #283 | Macao.ti,ab.                      | 243   |
| #284 | "New Caledonia".ti,ab.            | 1252  |
| #285 | "Northern Mariana Islands".ti,ab. | 106   |
| #286 | Oman.ti,ab.                       | 2113  |
| #287 | Portugal.ti,ab.                   | 9296  |
| #288 | "Puerto Rico".ti,ab.              | 5409  |
| #289 | "Saudi Arabia".ti,ab.             | 12003 |

|      |                                     |       |
|------|-------------------------------------|-------|
| #290 | Slovakia.ti,ab.                     | 3007  |
| #291 | "Slovak Republic".ti,ab.            | 580   |
| #292 | Slovenia.ti,ab.                     | 2676  |
| #293 | Trinidad.ti,ab.                     | 1963  |
| #294 | Tobago.ti,ab.                       | 776   |
| #295 | Mayotte.ti,ab.                      | 228   |
| #296 | "Netherlands Antilles".ti,ab.       | 147   |
| #297 | USSR.ti,ab.                         | 6768  |
| #298 | "Soviet Union".ti,ab.               | 3410  |
| #299 | "Soviet Socialist Republics".ti,ab. | 88    |
| #300 | Yugoslavia.ti,ab.                   | 2238  |
| #301 | "developing countr*".ti,ab.         | 50127 |
| #302 | "developing nation*".ti,ab.         | 2442  |
| #303 | "developing population*".ti,ab.     | 283   |
| #304 | "developing world".ti,ab.           | 7388  |
| #305 | "developing econom*".ti,ab.         | 363   |
| #306 | "low income countr*".ti,ab.         | 4567  |
| #307 | "middle income countr*".ti,ab.      | 9918  |
| #308 | "low income nation*".ti,ab.         | 63    |
| #309 | "middle income nation*".ti,ab.      | 71    |
| #310 | LMIC.ti,ab.                         | 867   |
| #311 | LMICS.ti,ab.                        | 1581  |
| #312 | "third world".ti,ab.                | 2928  |

|      |                                                                                                                          |         |
|------|--------------------------------------------------------------------------------------------------------------------------|---------|
| #313 | "LAMI countr*".ti,ab.                                                                                                    | 36      |
| #314 | "transitional countr*".ti,ab.                                                                                            | 139     |
| #315 | “developing countries” [Mesh]                                                                                            | 109580  |
| #316 | <b>or/93-315</b>                                                                                                         | 1115733 |
| #317 | 39 and 54 and 92 and 316                                                                                                 | 2585    |
| #318 | Limit 317 to (english language and humans and<br>yr="1989-current")                                                      | 1968    |
| #319 | <b>318 not ((case report or editorial).ti,ab. or<br/>editorial.ptyp. or letter.ptyp. or newspaper<br/>article.ptyp.)</b> | 1965    |
