# Supplementary material for: Factors Associated With Violence Against Children in Low- and Middle-Income Countries: A Systematic Review and Meta-Regression of Nationally Representative Data
Source: PubMed Central journal article supplement (PMC7961628; doi:10.1177/1524838020985532), 2021-01-19
Supplement: Appendix_B.pdf [file Appendix_B.pdf]

**Appendix B.** List of included databases

| Name |                             |
|------|-----------------------------|
| 1    | Medline/PubMed              |
| 2    | Embase                      |
| 3    | PsychINFO                   |
| 4    | Global Health               |
| 5    | Social Policy and Practice  |
| 6    | Scopus                      |
| 7    | CINAHL Plus                 |
| 8    | Africa-Wide Information     |
| 9    | Cochrane Systematic Reviews |
| 10   | Web of Science              |
| 11   | IBSS                        |
| 12   | LILACS                      |
| 13   | MedCarib                    |
| 14   | IMEMR                       |
| 15   | WPRIM                       |
| 16   | IndMED                      |
| 17   | CNKI English                |
