# Supplementary material for: Factors Associated With Violence Against Children in Low- and Middle-Income Countries: A Systematic Review and Meta-Regression of Nationally Representative Data
Source: PubMed Central journal article supplement (PMC7961628; doi:10.1177/1524838020985532), 2021-01-19
Supplement: Appendix_D.pdf [file Appendix_D.pdf]

## Appendix D. $p$ -value plots for publication bias

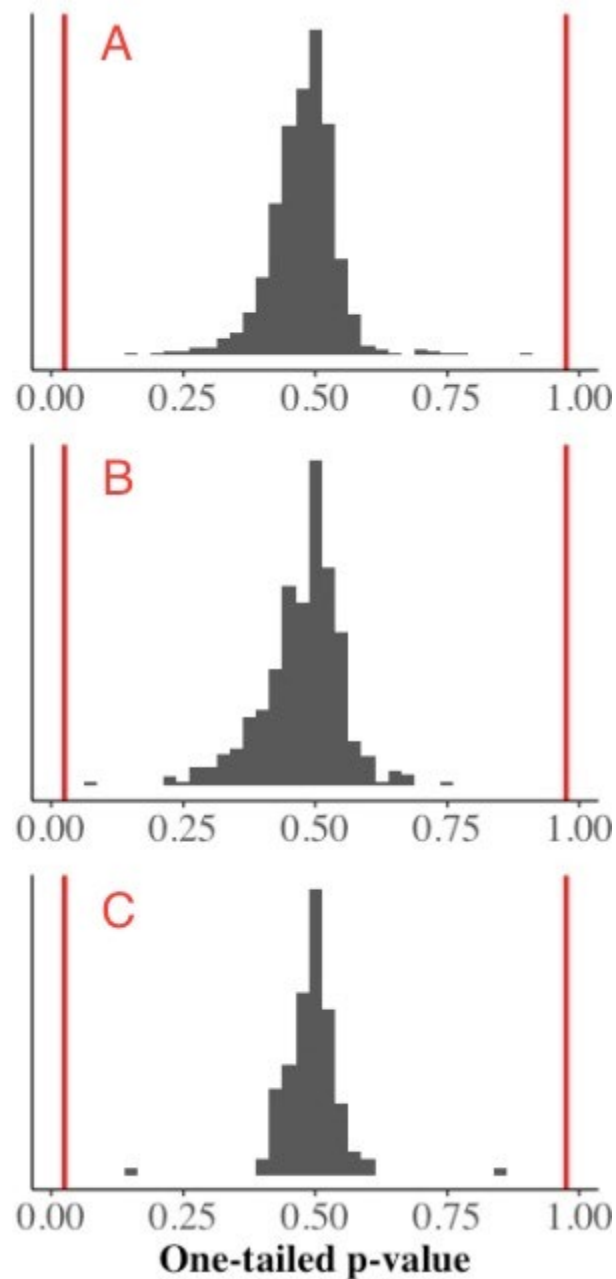

Figure A - physical violence; Figure B - emotional violence; Figure C - sexual violence.

The red lines indicate the extreme values of the tails of the distribution (upper 5%) in which it is assumed that positive results would be favored, leading to possible publication bias. Concentration of studies to the right of the upper red line suggest two-sided tests are appropriate (Mathur & VanderWeele, 2020). All studies fall within the middle 95% of the distribution for violence outcomes in the three figures.
